# Supplementary material for: Dengue infection in India: A systematic review and meta-analysis
Source: PLOS journal article supplement (doi:10.1371/journal.pntd.0006618), 2018-07-16

# A. Prevalence of lab confirmed dengue in hospital based studies

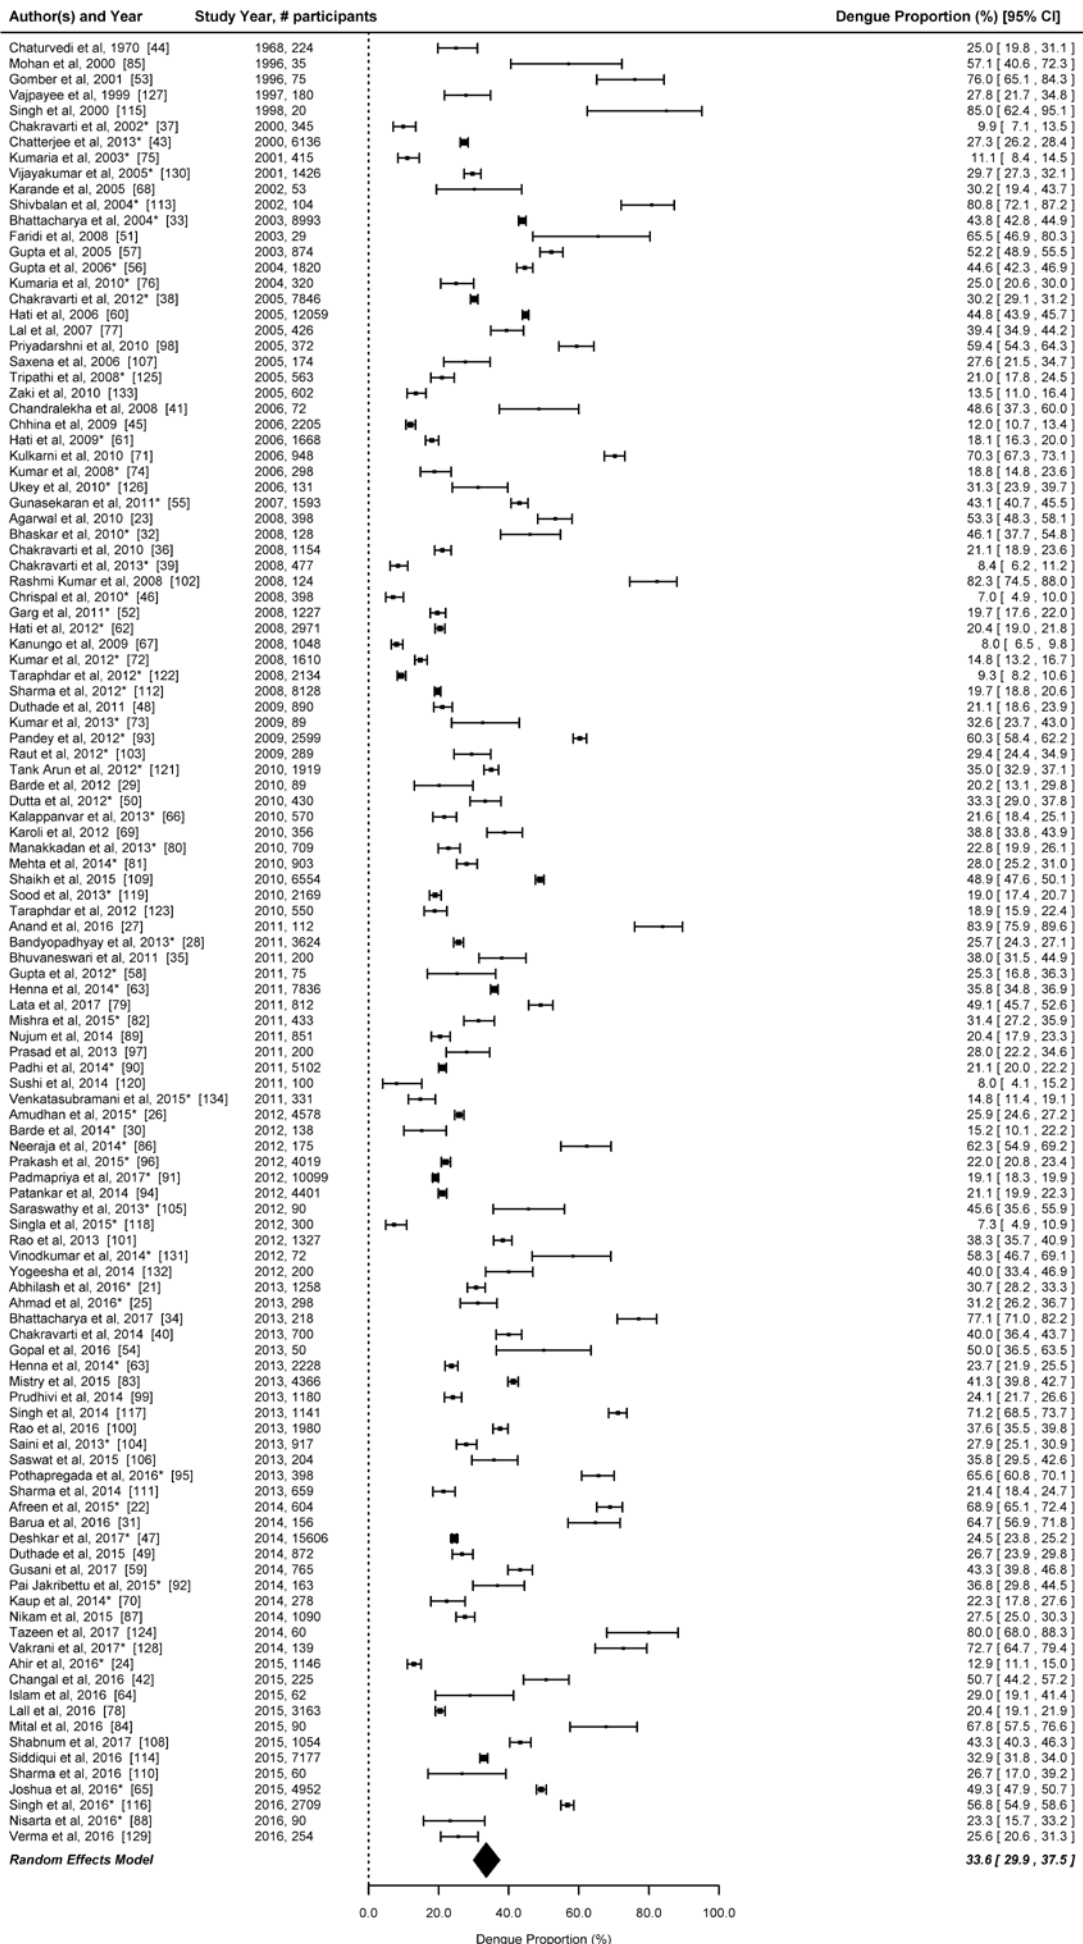

## B. Prevalence of lab confirmed dengue in hospital based studies during outbreak or outbreaks

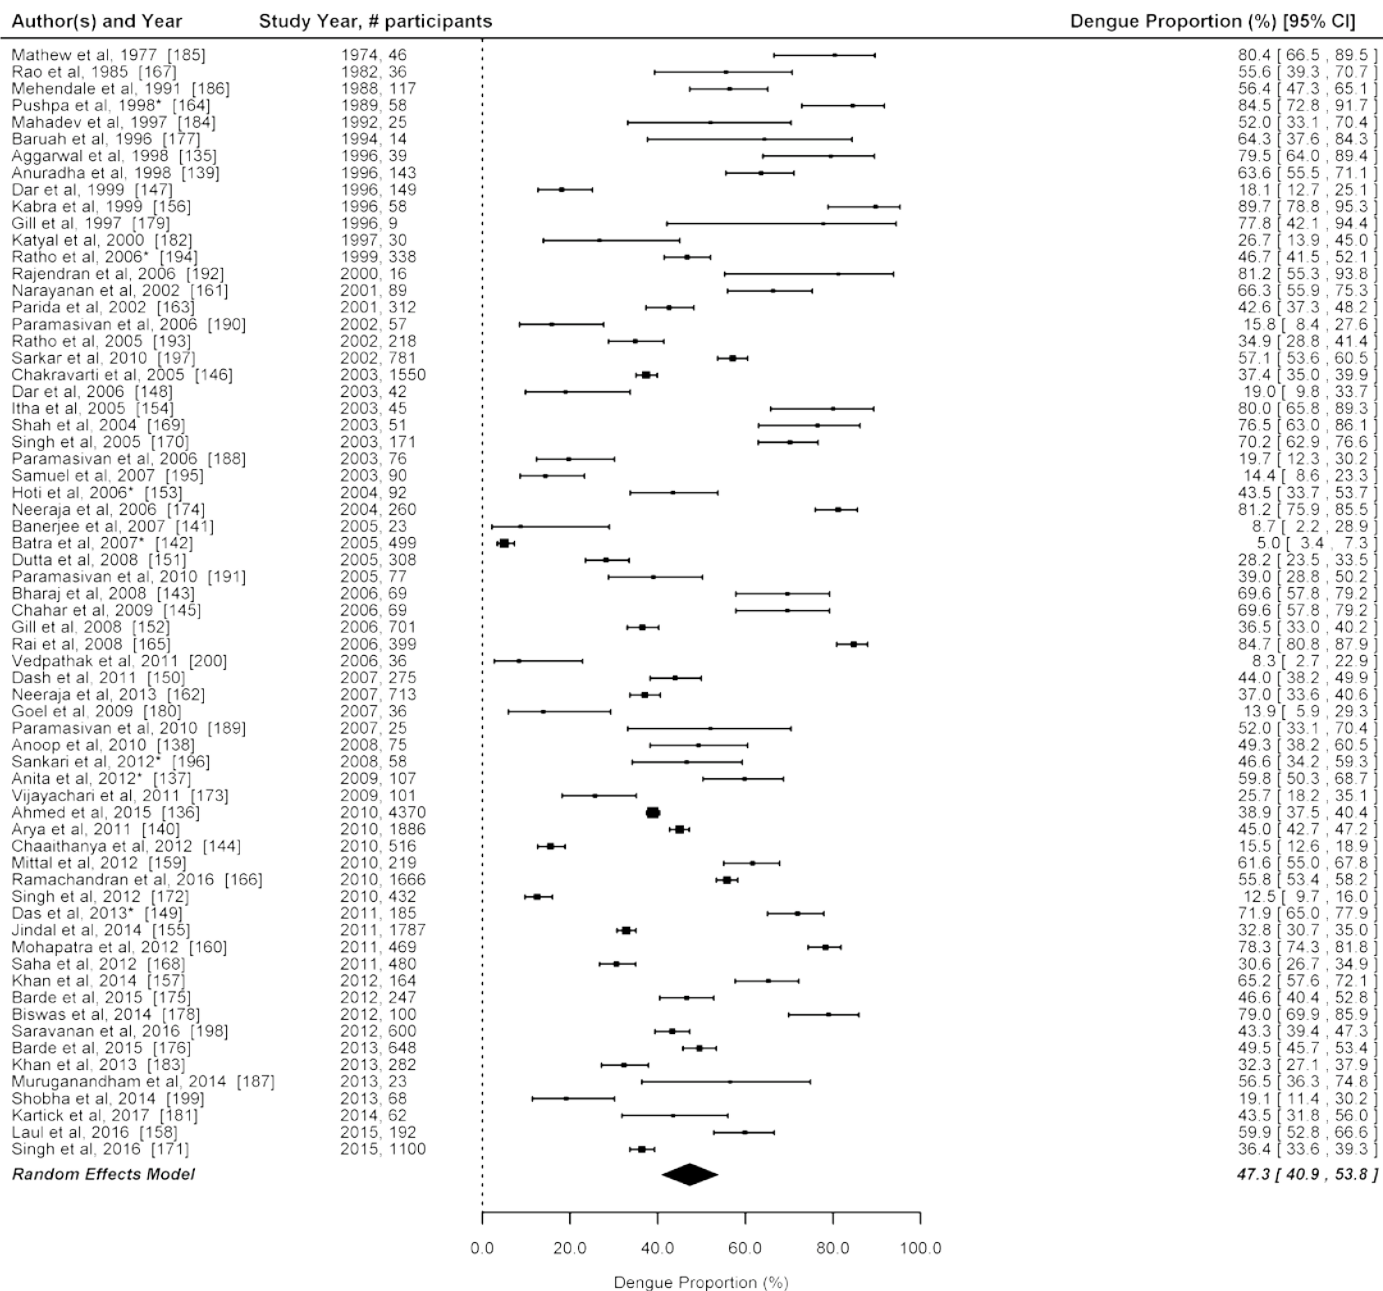

Supplement: S5 (10.1371/journal.pntd.0006618.s005) [file journal.pntd.0006618.s005]
